# Supplementary material
Source: publisher site journal article supplement (https://www.dovepress.com/article/288928)
Supplement: Supplementary file 1 [file get_supplementary_file.php]

**Supplementary materials:**

**Figure S1 new** Progression-free survival curve stratifying lung adenocarcinoma patients by the Lung-molGPA，added the 95% CI curves.
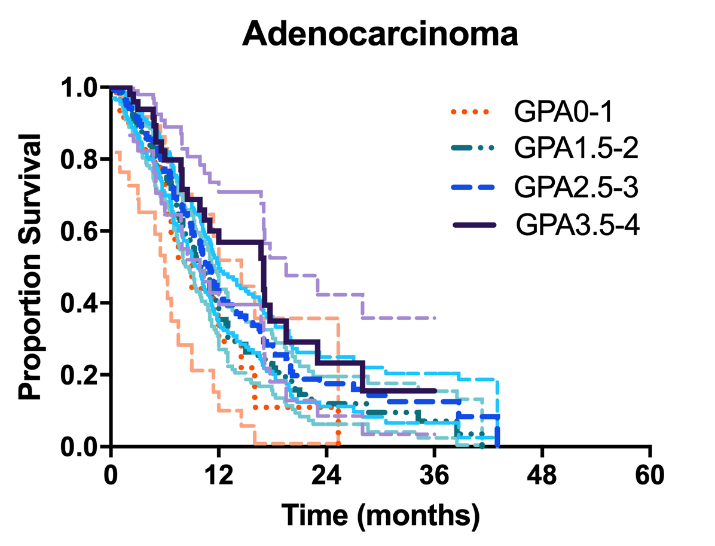


**Figure S1** Progression-free survival curve stratifying lung adenocarcinoma patients by the Lung-molGPA.


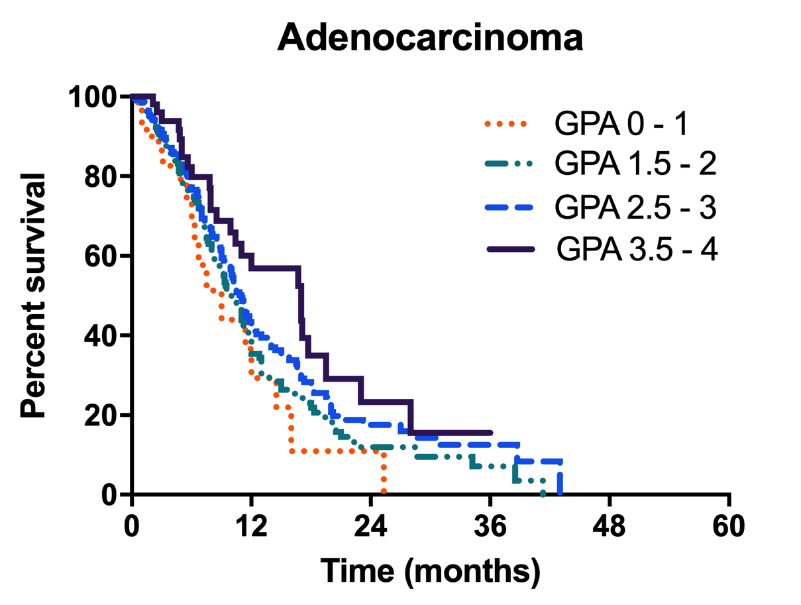


**Figure S2 new** Progression-free survival curves stratifying non-adenocarcinoma patients according to the Lung-molGPA， added the 95%CI curves.
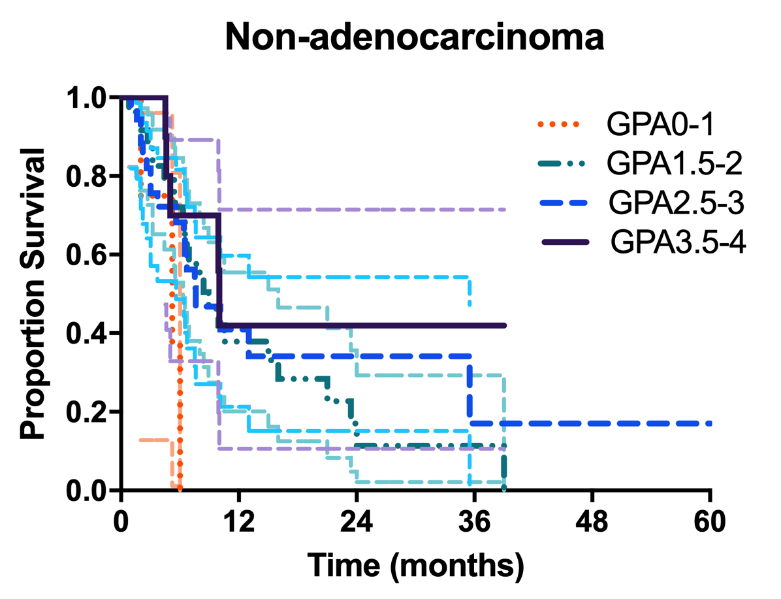


**Figure S2** Progression-free survival curves stratifying non-adenocarcinoma patients according to the Lung-molGPA
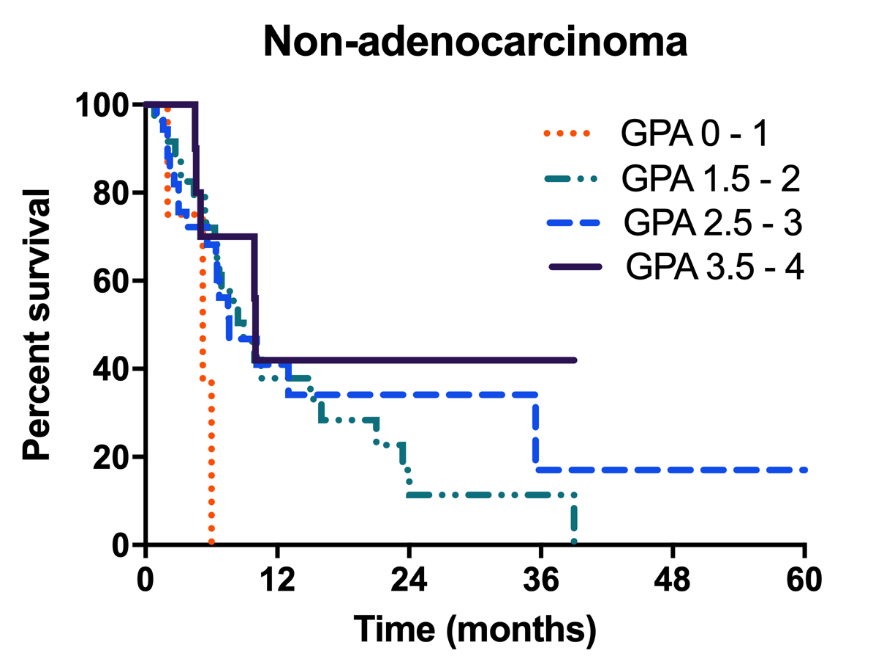


**Table S1:** The differences between adenocarcinoma and nonadenocarcinoma patients

| Parameter | Categories | N(%)  (Adenocarcinoma) | | N(%)  (Nonadenocarcinoma) |
| --- | --- | --- | --- | --- |
| KPS | 90-100 | 210(40.07%) | | 35(37.23%) |
|  | 80 | 263(50.19%) | | 47(50.00%) |
|  | < 80 | 51(9.74%) | | 12(12.77%) |
| Age | <70 | 459(87.60%) | | 79(84.04%) |
|  | ≥70 | 65(12.40%) | | 15(15.96%) |
| ECM | absent | 154(29.39%) | | 45(47.87%) |
|  | present | 370(70.61%) | | 49(52.13%) |
| BM | 1-4 | 325(62.02%) | | 66(70.21%) |
|  | >4 | 184(35.11%) | | 28(29.79%) |
|  | NA | 15(2.87%) | |  |
| Gene Status | EGFR pos or ALK pos | 218(41.60%) | | 6(6.38%) |
|  | *EGFR* neg/unk and *ALK* neg/unk | 115(21.95%) | | 13(13.83%) |
|  | NA | | 191(36.45%) | 75(79.79%) |
| Symptom | no | 324(61.83%) | | 54(57.45%) |
|  | yes | 200(38.17%) | | 40(42.55%) |
|  |  |  | |  |

KPS, Karnofsky Performance Status; ECM, extracranial metastases; BM, brain metastases.
